# Supplementary material
Source: PubMed Central journal article supplement (PMC4266725)
Supplement: ajcr0004-0934-f2.pdf [file ajcr0004-0934-f2.pdf]

## Polymorphisms in oxidative stress-related genes in NSCLC

**Table S1.** Candidate genes and SNPs included in the study

| Gene    | SNP        | Chromosome | Rare allele | Common allele | MAF  | Function  | HWE-P   |
|---------|------------|------------|-------------|---------------|------|-----------|---------|
| SOD2    | rs4880     | 6          | C           | T             | 0.15 | Val16Ala  | 0.284   |
| GSTP1   | rs1695     | 11         | G           | A             | 0.21 | Ile105Val | 0.787   |
| TXN2    | rs2281082  | 22         | G           | T             | 0.29 | Intronic  | 0.104   |
| PPARG*  | rs1801282  | 3          | G           | C             | 0.07 | Pro12Ala  | < 0.001 |
| GPX1    | rs1800668  | 3          | T           | C             | 0.09 | Promoter  | 0.339   |
| CAT     | rs769214   | 11         | A           | G             | 0.29 | 5' UTR    | 0.087   |
| PON1    | rs662      | 7          | A           | G             | 0.35 | Q192R     | 0.491   |
| NOS2    | rs2297518  | 17         | A           | G             | 0.18 | Ser608Leu | 0.410   |
| NOS3    | rs1799983  | 7          | T           | G             | 0.14 | Glu298Asp | 0.829   |
| MPO     | rs2333227  | 17         | G           | A             | 0.16 | Promoter  | 0.426   |
| GPX1    | rs1050450  | 3          | T           | C             | 0.11 | Pro200Leu | 0.614   |
| NQO1    | rs1800566  | 16         | T           | C             | 0.49 | Pro187Ser | 0.067   |
| CYBA    | rs4673     | 16         | T           | C             | 0.08 | His72Tyr  | 0.209   |
| AKR1C3* | rs1937840  | 10         | C           | G             | 0.19 | Intronic  | < 0.001 |
| RAC1    | rs10951982 | 7          | A           | G             | 0.20 | Intronic  | 0.092   |
| KL      | rs3752472  | 13         | T           | C             | 0.10 | Pro514Ser | 0.497   |
| BLVRA   | rs699512   | 7          | G           | A             | 0.32 | Thr3Ala   | 1.000   |
| GPX4    | rs713041   | 19         | T           | C             | 0.46 | 3' UTR    | 0.090   |
| GCLC    | rs17883901 | 6          | T           | C             | 0.12 | Promoter  | 0.990   |
| MT2A    | rs10636    | 16         | C           | G             | 0.32 | 3' UTR    | 0.910   |

MAF: minor allele frequency; HWE: Hardy-Weinberg equilibrium. \*indicates SNPs deviated from Hardy-Weinberg equilibrium and thus excluded from the analysis.

**Table S2.** Associations between SNPs and progression-free and overall survival of NSCLC patients

| Gene  | SNP        | Progression-free survival |         | Overall survival    |         |
|-------|------------|---------------------------|---------|---------------------|---------|
|       |            | HR (95% CI)               | P value | HR (95% CI)         | P value |
| SOD2  | rs4880     | 0.819 (0.601-1.114)       | 0.203   | 1.158 (0.859-1.560) | 0.336   |
| GSTP1 | rs1695     | 1.293 (0.967-1.730)       | 0.083   | 0.679 (0.510-0.904) | 0.008   |
| TXN2  | rs2281082  | 1.171 (0.933-1.471)       | 0.174   | 0.936 (0.752-1.165) | 0.553   |
| GPX1  | rs1800668  | 1.224 (0.830-1.804)       | 0.308   | 0.848 (0.594-1.209) | 0.361   |
| CAT   | rs769214   | 1.009 (0.797-1.277)       | 0.941   | 1.035 (0.820-1.308) | 0.770   |
| PON1  | rs662      | 1.012 (0.803-1.274)       | 0.921   | 1.085 (0.861-1.367) | 0.489   |
| NOS2  | rs2297518  | 0.934 (0.688-1.267)       | 0.659   | 0.776 (0.579-1.040) | 0.090   |
| NOS3  | rs1799983  | 0.736 (0.537-1.009)       | 0.057   | 1.168 (0.842-1.620) | 0.354   |
| MPO   | rs2243828  | 0.934 (0.702-1.242)       | 0.639   | 0.685 (0.519-0.904) | 0.007   |
| GPX1  | rs1050450  | 1.146 (0.793-1.658)       | 0.468   | 1.193 (0.838-1.697) | 0.327   |
| NQO1  | rs1800566  | 0.951 (0.759-1.190)       | 0.659   | 0.932 (0.801-1.085) | 0.366   |
| CYBA  | rs4673     | 1.349 (0.895-2.035)       | 0.153   | 0.783 (0.556-1.101) | 0.159   |
| RAC1  | rs10951982 | 1.173 (0.862-1.596)       | 0.310   | 0.972 (0.730-1.296) | 0.848   |
| KL    | rs3752472  | 0.901 (0.608-1.335)       | 0.603   | 1.113 (0.772-1.606) | 0.565   |
| BLVRA | rs699512   | 0.969 (0.763-1.231)       | 0.799   | 0.786 (0.628-0.985) | 0.036   |
| GPX4  | rs713041   | 0.874 (0.714-1.069)       | 0.190   | 0.903 (0.735-1.108) | 0.329   |
| MT2A  | rs10636    | 1.042 (0.827-1.314)       | 0.726   | 1.000 (0.794-1.262) | 0.997   |
| GCLC  | rs17883901 | 0.968 (0.684-1.372)       | 0.857   | 1.145 (0.868-1.511) | 0.338   |
